# Supplementary material for: An ROS-Responsive, RGC-Targeted Nanotherapeutic Strategy with a TRPV4 Antagonist Restores Autophagic Flux for Glaucomatous Neurodegeneration
Source: Research Square preprint supplement (doi:10.21203/rs.3.rs-8886453/v1), 2026-02-23
Supplement: Supplementary file 1 [file dae00841f76190f681ed5f18.docx]

Supplementary Material

**
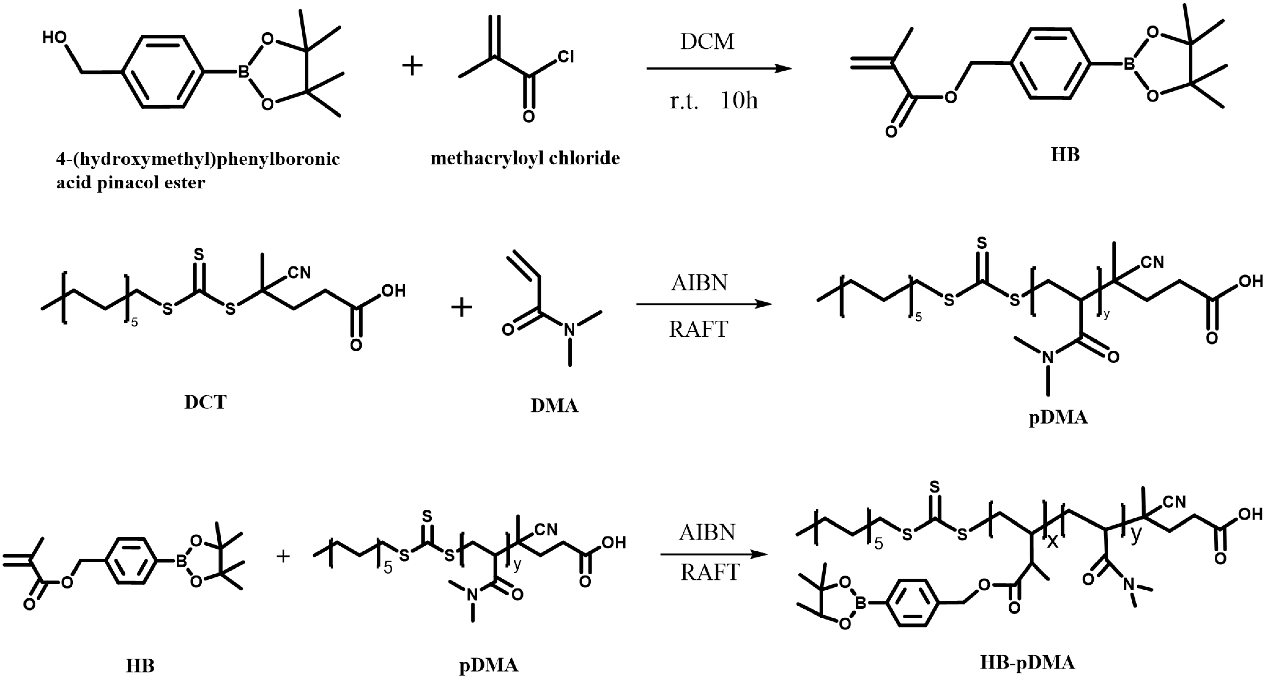
**

**Figure S1.** Synthetic route of HB-pDMA.


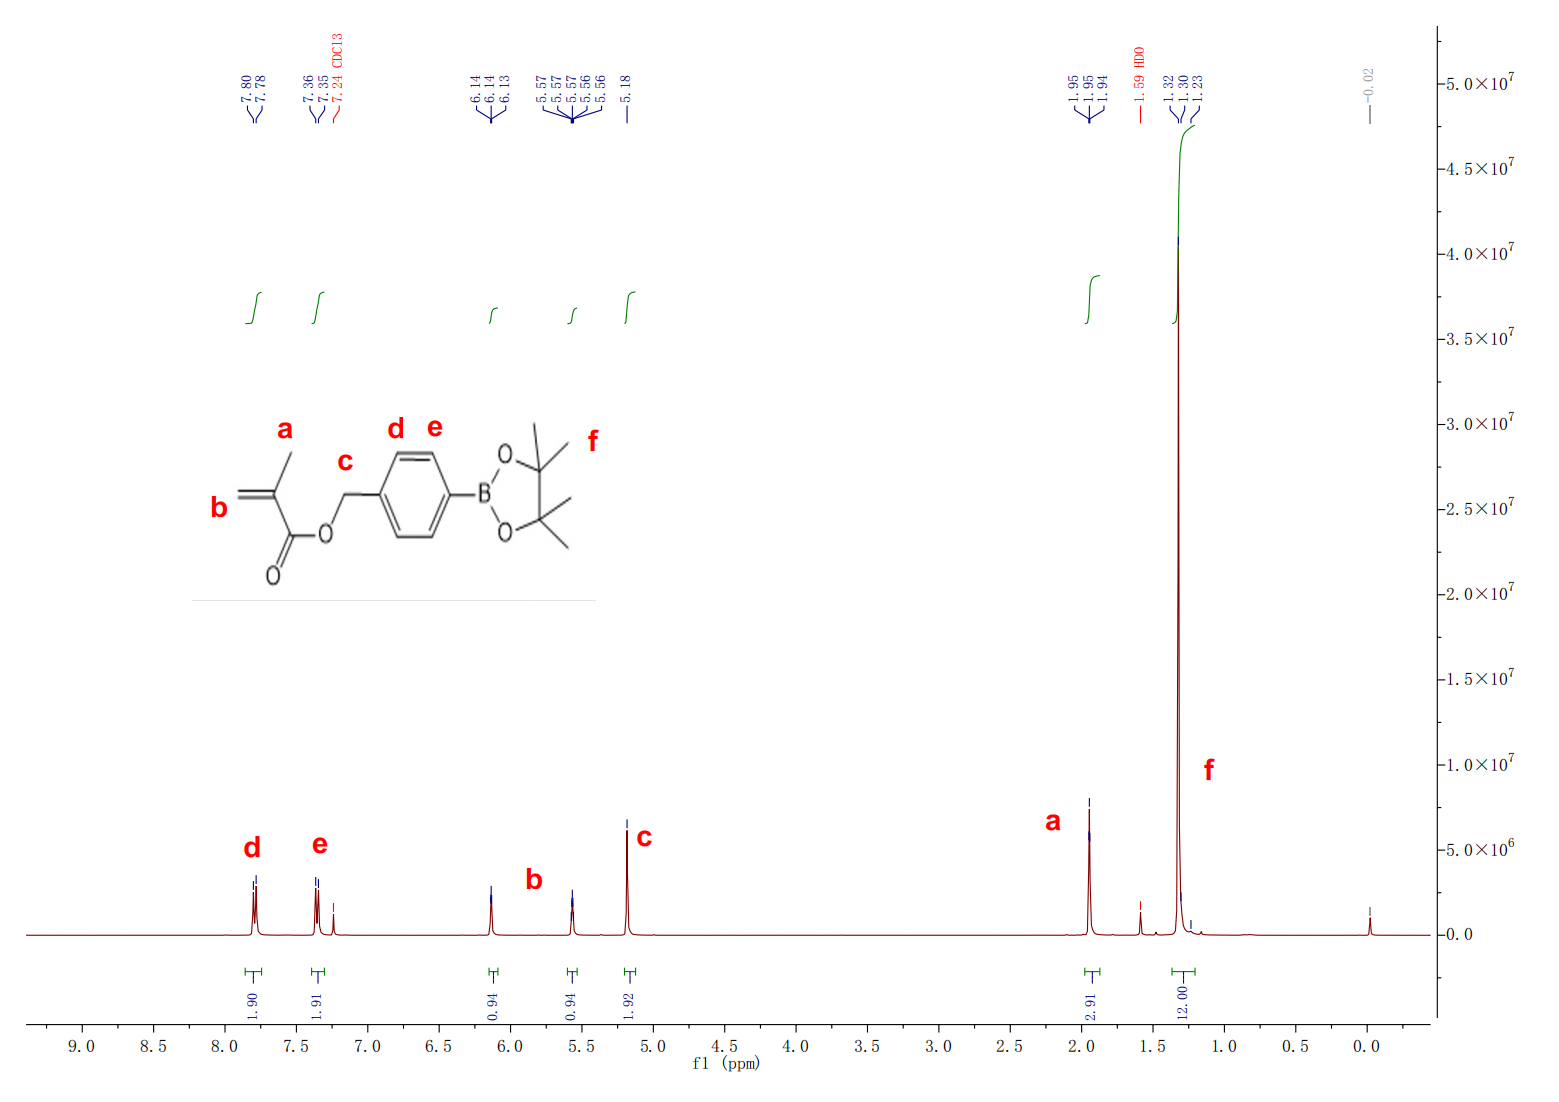


**Figure S2.** 1H NMR spectrum of HB. (CDCl3, 400MHz)


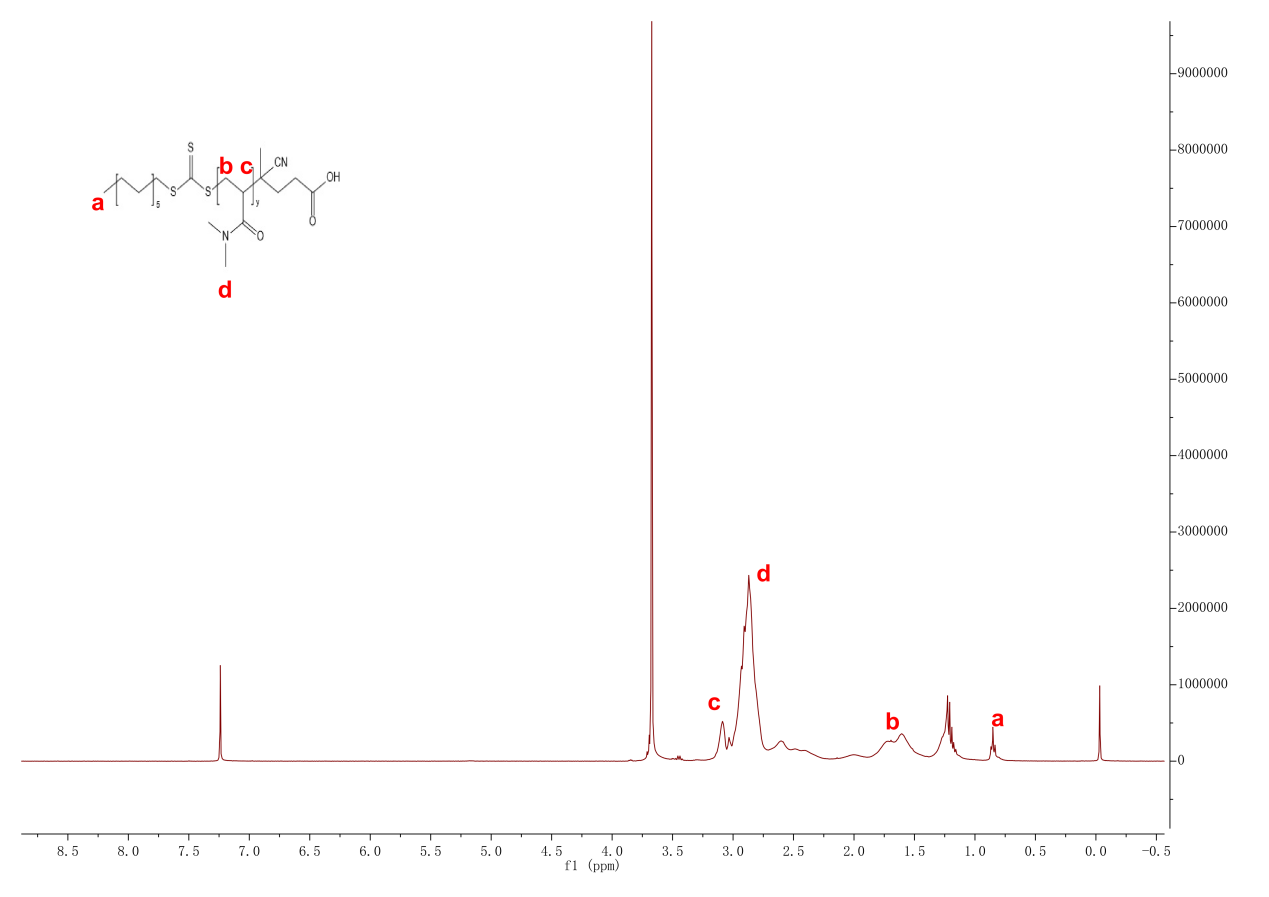


**Figure S3.** 1H NMR spectrum of pDMA. (CDCl3, 400MHz)


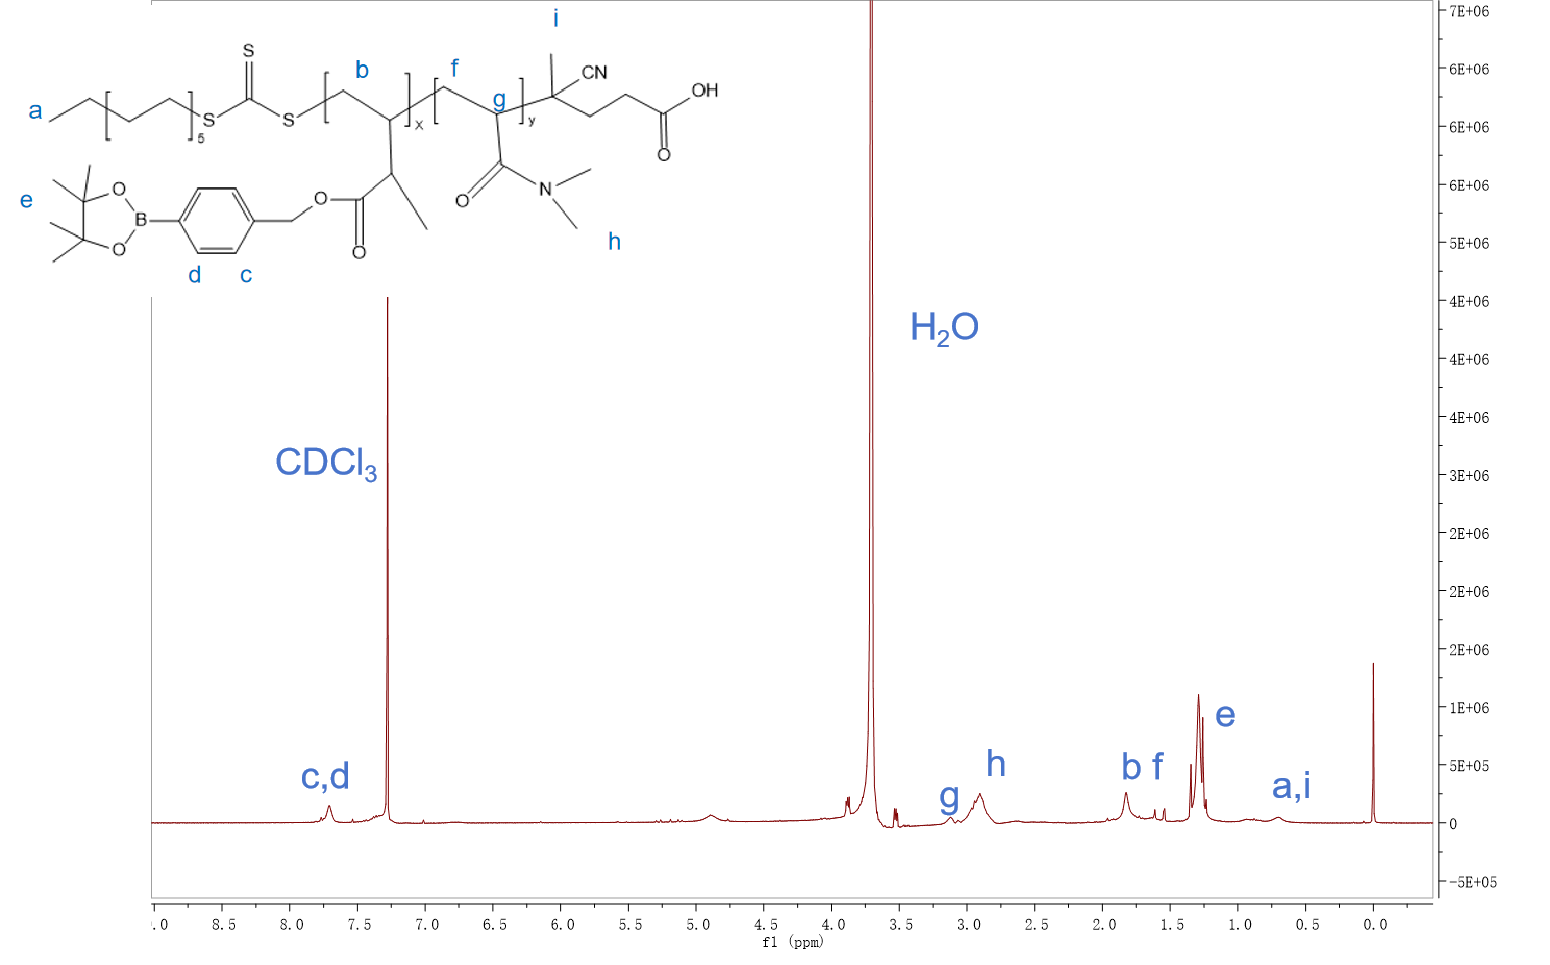


**Figure S4.** 1H NMR spectrum of HB-pDMA. (CDCl3, 400MHz)


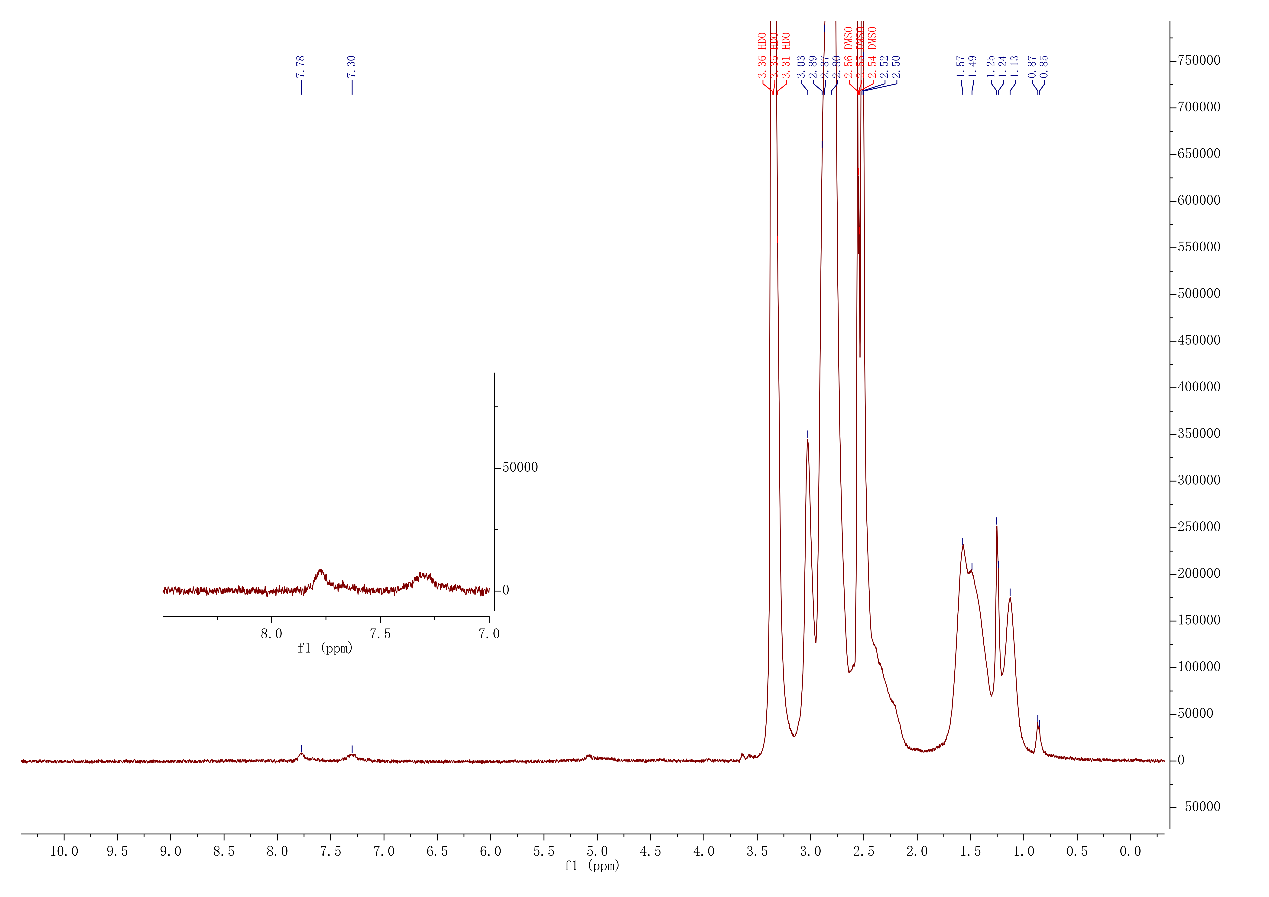


**Figure S5.** 1H NMR spectrum of HB-pDMA-CTB. (DMSO-d6, 400MHz)

**Figure S6.** Encapsulation Efficiency of Nanoparticles. Data are presented as the mean ± SD (n = 3).


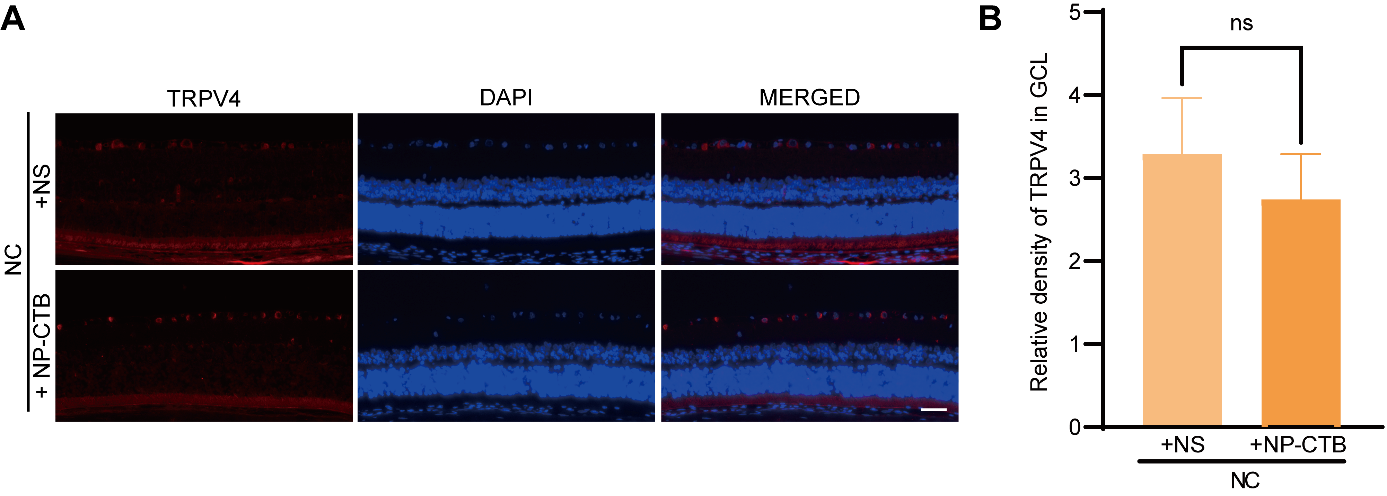


**Figure S7.** Immunofluorescence analysis of TRPV4 expression in retinal sections from normal rats with or without NP-CTB treatment. (A–B) Representative immunofluorescence images showing TRPV4 expression in retinal sections from normal rats treated with or without NP-CTB, with quantification of TRPV4 fluorescence intensity. TRPV4 is shown in red, and nuclei are counterstained with DAPI (blue). Scale bar, 50 μm. Statistical analysis was performed using unpaired Student’s t-test (B) and data are presented as mean ± SD (n = 3). ns, not significant.
